# Supplementary material
Source: ML conference proceedings conference paper supplement (https://openaccess.thecvf.com/content/ICCV2021/html/Du_Neural_Radiance_Flow_ICCV_2021_paper.html)
Supplement: Supplementary file 3 [file Du_Neural_Radiance_Flow_ICCV_2021_supplemental.zip]

Archive with 4 entries (4 files):
- vis.mp4
- __MACOSX/._vis.mp4
- main_paper_and_appendix.pdf
- __MACOSX/._main_paper_and_appendix.pdf
